# Supplementary material
Source: publisher site journal article supplement (http://www.kjim.org/upload/media/kjim-2021-272-suppl1.pdf)
Supplement: Supplementary file 1 [file kjim-2021-272-suppl1.pdf]

**Supplementary Table 1. Calculation of HFA-PEFF score**

| Parameter     | HFA-PEFF score                                                                                                    |       |                                                                                                                          |       |
|---------------|-------------------------------------------------------------------------------------------------------------------|-------|--------------------------------------------------------------------------------------------------------------------------|-------|
|               | Major                                                                                                             |       | Minor                                                                                                                    |       |
|               | Value                                                                                                             | Point | Value                                                                                                                    | Point |
| Functional    | Septal e' < 7 cm/sec or lateral e' < 10 cm/sec<br>or average E/e' ≥ 15<br>or TR Vmax > 2.8 m/sec (PASP > 35 mmHg) | 2     | Average E/e' 9–14<br>or<br>GLS < 16%                                                                                     | 1     |
| Morphological | LAVI > 34 mL/m <sup>2</sup><br>or LVMI ≥ 149/122 g/m <sup>2</sup> (M/W) + RWT > 0.42                              | 2     | LAVI 29–34 mL/m <sup>2</sup><br>or LVMI ≥ 115/95 g/m <sup>2</sup> (M/W)<br>or RWT > 0.42<br>or LV wall thickness ≥ 12 mm | 1     |
| Biomarker     |                                                                                                                   |       |                                                                                                                          |       |
| SR            | NT-proBNP > 220 pg/mL<br>or BNP > 80 pg/mL                                                                        | 2     | NT-proBNP 125–220 pg/mL<br>or BNP 35–80 pg/mL                                                                            | 1     |
| AF            | NT-proBNP > 660 pg/mL<br>or BNP > 240 pg/mL                                                                       | 2     | NT-proBNP 365–660 pg/mL<br>or BNP 105–240 pg/mL                                                                          | 1     |

Adapted from Kim et al. [13].

HFA-PEFF, heart Failure Association-PEFF; e', early diastolic mitral annular velocity; E, early transmitral flow velocity; TR V, tricuspid regurgitation velocity; PASP, pulmonary artery systolic pressure; GLS, left ventricular global longitudinal strain; LAVI, left atrial volume index; LVMI, left ventricular mass index; RWT, relative wall thickness; LV, left ventricle; SR, sinus rhythm; NT-proBNP, N-terminal pro-B-type natriuretic peptide; BNP, B-type natriuretic peptide; AF, atrial fibrillation.
